# Supplementary material for: Anadromous Arctic Char Microbiomes: Bioprospecting in the High Arctic
Source: PubMed Central journal article supplement (PMC6399304; doi:10.3389/fbioe.2019.00032), 2019-02-26
Supplement: Table_3.pdf [file Table_3.pdf]

**Table S3:** Euclidean distances between the eight clusters based on the microbiota present in the skin of arctic char.

---

|           | Cluster | Cluster | Cluster | Cluster | Cluster | Cluster | Cluster | Cluster |
|-----------|---------|---------|---------|---------|---------|---------|---------|---------|
|           | 1       | 2       | 3       | 4       | 5       | 6       | 7       | 8       |
| Cluster 1 | 0.00    |         |         |         |         |         |         |         |
| Cluster 2 | 0.02    | 0.00    |         |         |         |         |         |         |
| Cluster 3 | 0.03    | 0.03    | 0.00    |         |         |         |         |         |
| Cluster 4 | 0.03    | 0.03    | 0.04    | 0.00    |         |         |         |         |
| Cluster 5 | 0.03    | 0.03    | 0.03    | 0.04    | 0.00    |         |         |         |
| Cluster 6 | 0.01    | 0.01    | 0.02    | 0.03    | 0.02    | 0.00    |         |         |
| Cluster 7 | 0.02    | 0.02    | 0.03    | 0.04    | 0.03    | 0.02    | 0.00    |         |
| Cluster 8 | 0.02    | 0.02    | 0.03    | 0.04    | 0.03    | 0.02    | 0.03    | 0.00    |

---
