# Supplementary material for: Anadromous Arctic Char Microbiomes: Bioprospecting in the High Arctic
Source: PubMed Central journal article supplement (PMC6399304; doi:10.3389/fbioe.2019.00032), 2019-02-26
Supplement: Table_5.pdf [file Table_5.pdf]

**Table S5:** Euclidean distances between the eight clusters based on the microbiota present in the intestine of arctic char.

|           | Cluster 1 | Cluster 2 | Cluster 3 | Cluster 4 | Cluster 5 | Cluster 6 | Cluster 7 | Cluster 8 |
|-----------|-----------|-----------|-----------|-----------|-----------|-----------|-----------|-----------|
| Cluster 1 | 0.00      |           |           |           |           |           |           |           |
| Cluster 2 | 0.05      | 0.00      |           |           |           |           |           |           |
| Cluster 3 | 0.05      | 0.05      | 0.00      |           |           |           |           |           |
| Cluster 4 | 0.03      | 0.03      | 0.04      | 0.00      |           |           |           |           |
| Cluster 5 | 0.04      | 0.04      | 0.05      | 0.02      | 0.00      |           |           |           |
| Cluster 6 | 0.05      | 0.05      | 0.05      | 0.03      | 0.04      | 0.00      |           |           |
| Cluster 7 | 0.05      | 0.05      | 0.05      | 0.04      | 0.04      | 0.05      | 0.00      |           |
| Cluster 8 | 0.05      | 0.05      | 0.05      | 0.03      | 0.04      | 0.04      | 0.05      | 0.00      |
